# Supplementary material
Source: PubMed Central journal article supplement (PMC4349989)
Supplement: supp_M114.044016_mcp.M114.044016-1.pdf [file supp_M114.044016_mcp.M114.044016-1.pdf]

1 **Supplementary information**

2

3

4

5

6

7

8

9

10

11

12

13

14

15

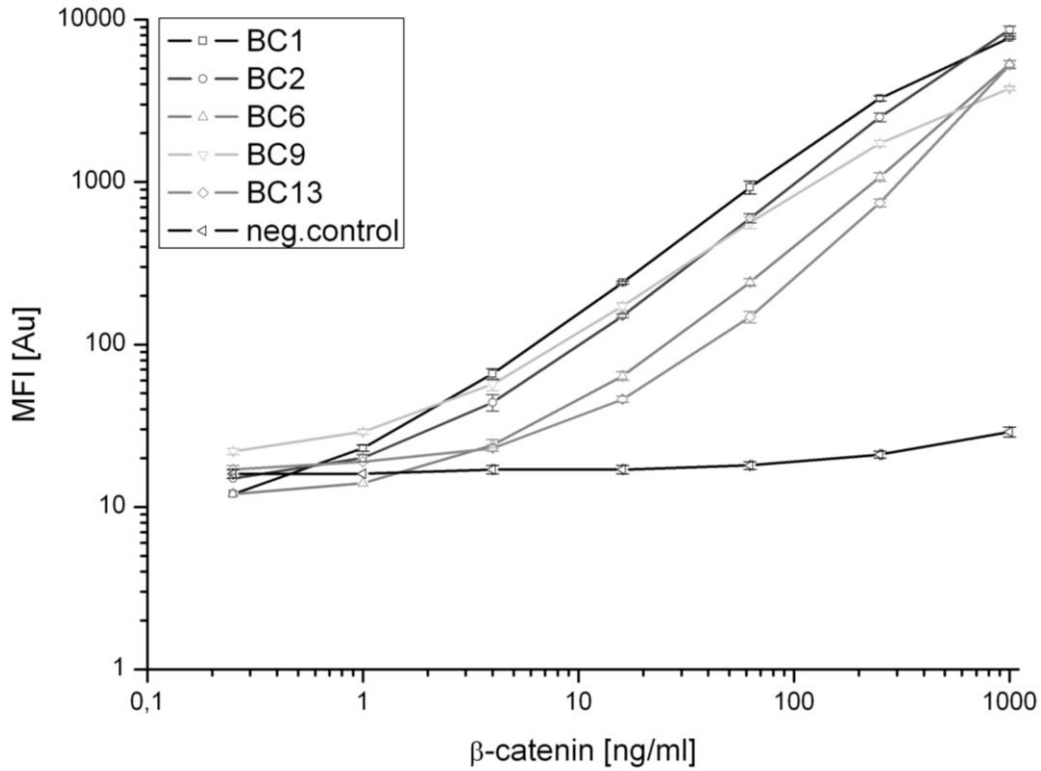

16 **suppl. Figure 1**

17  $\beta$ -catenin-specific nanobodies show high binding sensitivities. Nbs were covalently immobilized

18 on microspheres and incubated with serial dilutions of  $\beta$ -catenin ranging from 0.2 ng/ml to 1

19  $\mu$ g/ml. Bound protein was detected with an anti- $\beta$ -catenin antibody. Shown are mean signal

20 intensities of three independent replicates  $\pm$  stds.

21

22  
23  
24  
25  
26  
27  
28  
29  
30  
31  
32  
33  
34  
35  
36  
37  
38  
39  
40  
41  
42

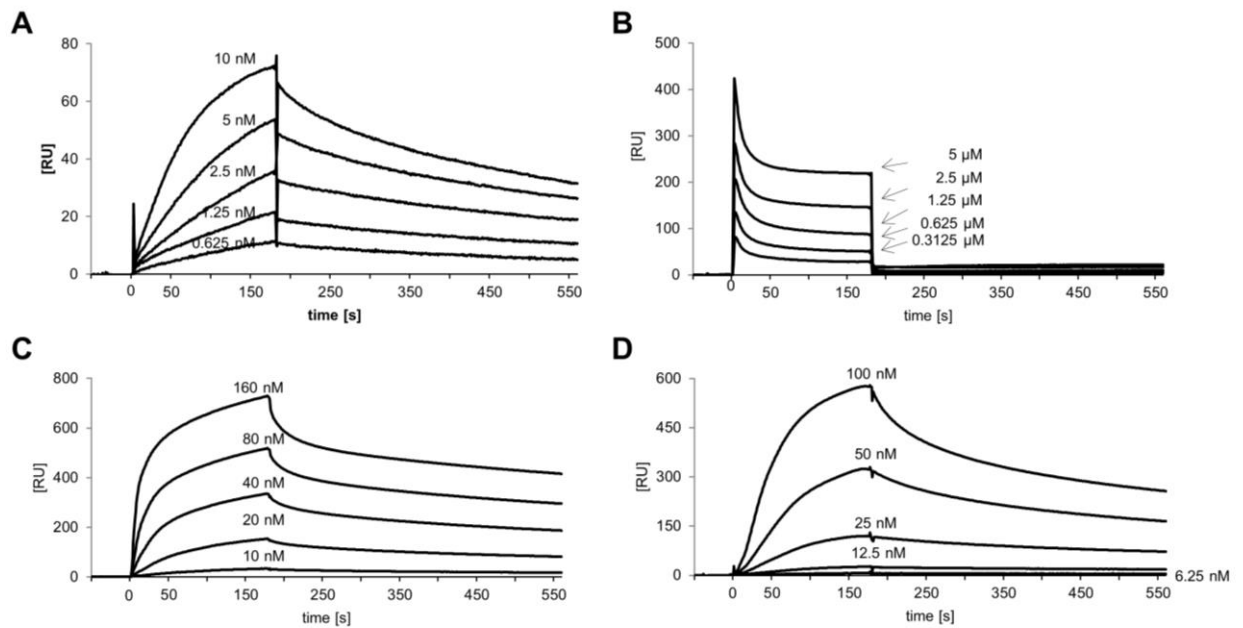

**suppl. Figure 2**

Affinity measurements of  $\beta$ -catenin-specific nanobodies. Nbs were used for surface plasmon resonance spectroscopy (SPR) measurements against immobilized  $\beta$ -catenin as described in the result section and Figure 2. SPR sensograms of BC2 (A), BC6 (B), BC9 (C) and BC13 (D) with indicated Nb concentrations are shown. The Nb injection time was 180 s, followed by a dissociation time of 300 s. The data was evaluated using the software Bia evaluation 4.1 and the 1:1 Langmuir binding model.

43

44

45

46

47

48

49

50

51

**A**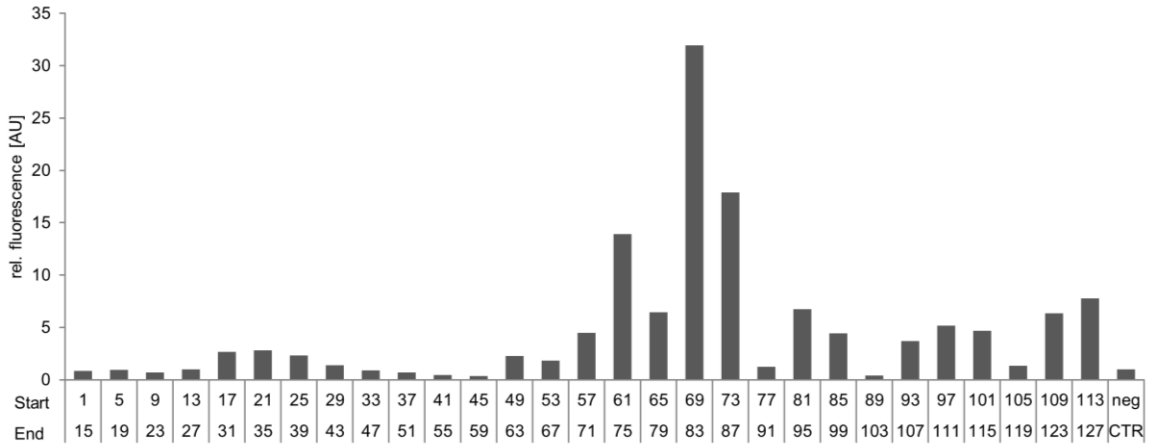

52

**B**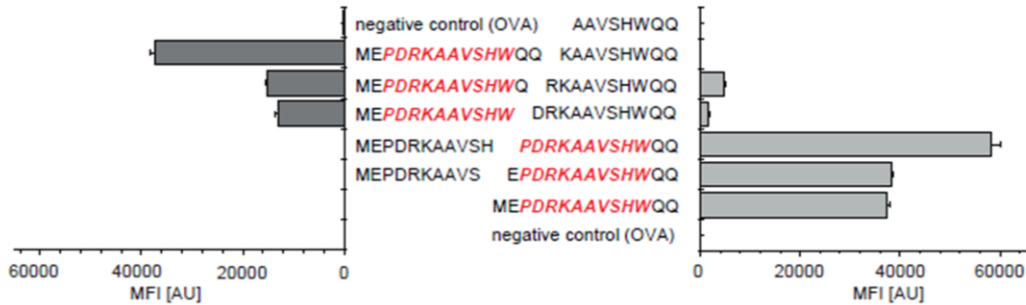

56

57

**suppl. Figure 3**

59 Nanobodies bind distinct epitopes at the N-terminus of  $\beta$ -catenin. (A) Identification of the

60 epitope for BC1 using a peptide screen. 29 overlapping 15-mer peptides covering the N-

61 terminus from aa 1-127 of  $\beta$ -catenin were immobilized on microspheres with varying IDs per

62 peptide and incubated with biotinylated BC1. Peptide-bound BC1 nanobodies were detected

63 with streptavidin-phycoerythrin (PE). The Myc-peptide (EKLISEEDL) was used as negative

64 control. (B) Determination of the minimal epitope of BC2. Incubation of serial N- and C-

65 terminally truncated peptides covering aa 14 - 27 of  $\beta$ -catenin with biotinylated BC2. Peptide-

66 bound BC2 nanobodies were detected with streptavidin-phycoerythrin (PE). Aminoacid residues

67 comprising the minimal epitope of BC2 are highlighted in red. Shown are mean signal intensities

68 of three independent replicates  $\pm$  stds.

69  
70  
71  
72  
73  
74  
75  
76  
77  
78  
79  
80  
81

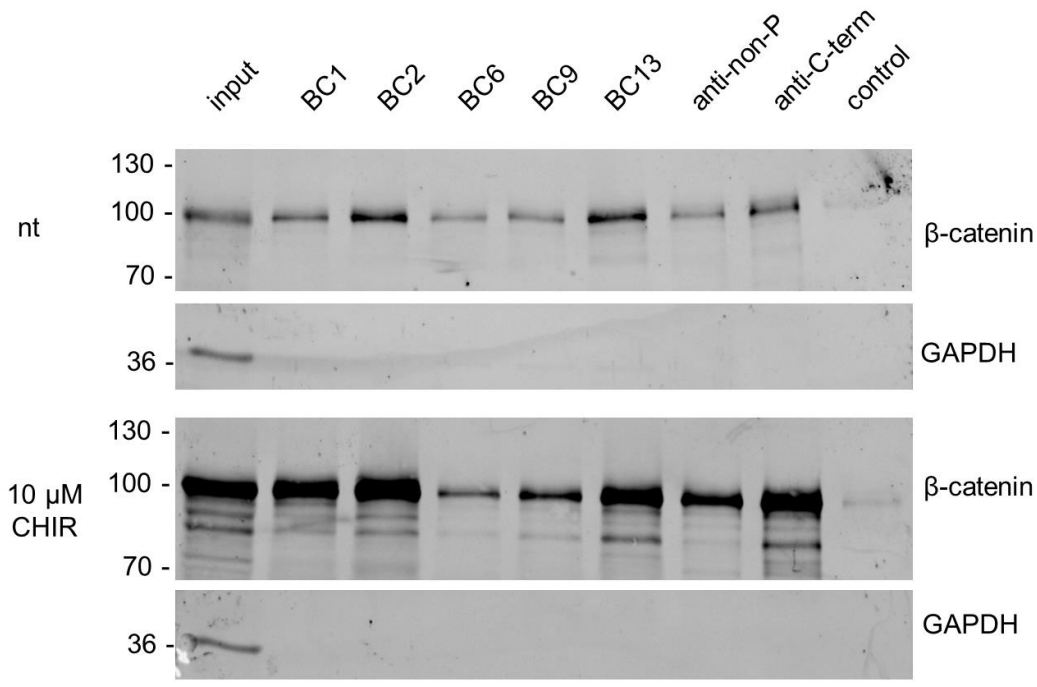

82 **suppl. Figure 4**  
83  
84  
85  
86  
87  
88  
89  
90  
91  
92  
93  
94

**suppl. Figure 4**  
Nanobodies bind endogenous  $\beta$ -catenin comparable to conventional antibodies.  
HEK293T cells were either left untreated (nt) or were incubated with CHIR (GSK3 $\beta$ -inhibitor) for 24 h. Cells were lysed under native conditions and membrane-bound fraction was depleted using Concanavalin A (ConA)-beads. Depleted supernatants were adjusted to 2 mg/ml and incubated with equal amounts of immobilized Nbs. For the precipitation using conventional antibodies an anti-non-phospho antibody (anti-non-P) or an antibody directed against the C-terminus of  $\beta$ -catenin (anti-C-term) was used. Both antibodies were immobilized on Protein A/G sepharose. Input and bound fractions were subjected to SDS-PAGE followed by immunoblot analysis using antibodies specific for  $\beta$ -catenin and GAPDH. *Input*: 0.5% of ConA-depleted supernatant; *BC1 – BC13*: 10% of bound fraction of nanobodies as indicated; *anti-non-P* and *anti-C-term*: 10% of antibody bound fraction; *control*: 10 % of bound fraction of a non-related nanobody. Shown are representative blots of three independent experiments.

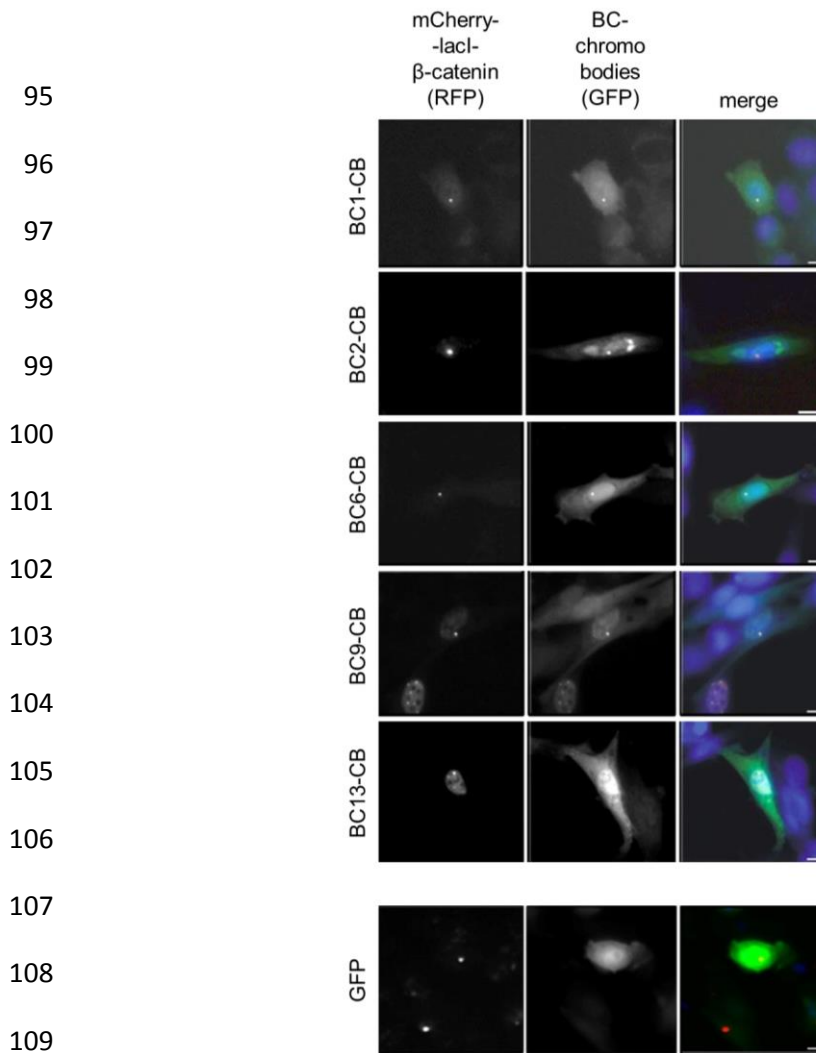

110 **suppl. Figure 5**

111 BC-chromobodies bind  $\beta$ -catenin within living cells in a Fluorescent Two-hybrid assay.  
 112 Transgenic BHK (baby hamster kidney) cells containing a lac operator array were co-  
 113 transfected with expression constructs coding for mCherry-lacI- $\beta$ -catenin and the GFP-tagged  
 114 chromobodies BC1,-2,-6,-9,-13 or EGFP as negative control. Upon expression the red  
 115 fluorescent  $\beta$ -catenin construct localizes at the lac operator array and thus becomes visible as  
 116 precise red spots within the nucleus. Mediated by the intracellular interaction,  $\beta$ -catenin-specific  
 117 chromobodies (BC-chromobodies) are recruited to these spots and a co-localization of mCherry  
 118 and GFP fluorescence is visible in an image overlay. In cells expressing GFP in combination  
 119 with mCherry-lacI- $\beta$ -catenin no fluorescence co-localization is observable. Shown are  
 120 representative images. Scale bar: 10  $\mu$ M.

121  
122  
123  
124  
125  
126  
127  
128  
129  
130  
131  
132  
133  
134  
135  
136  
137  
138  
139  
140  
141  
142  
143

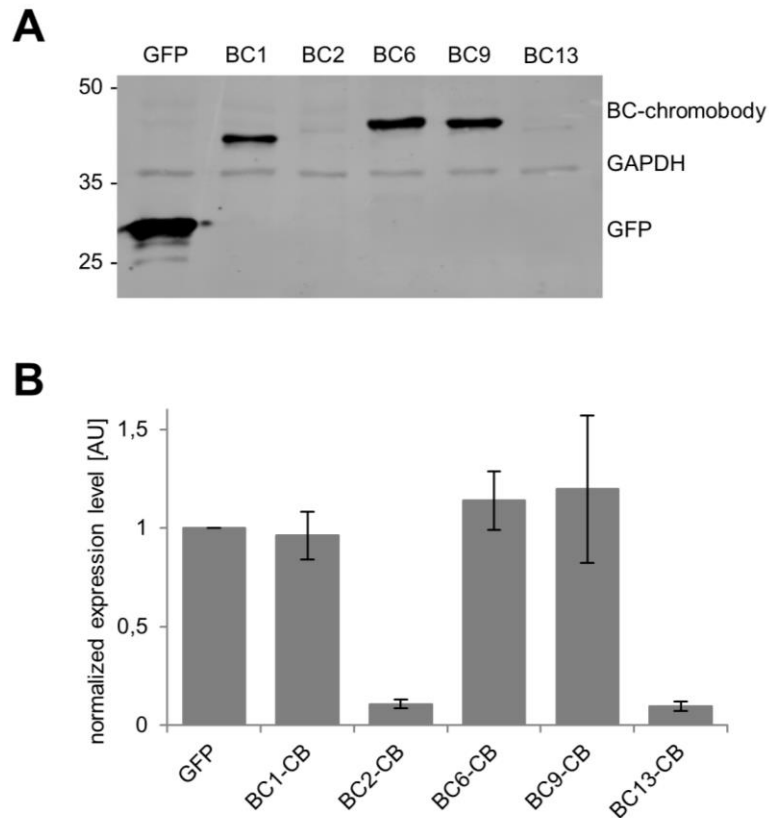

**suppl. Figure 6**

BC-chromobodies show different intracellular protein levels. **(A)** Immunoblot analysis of soluble protein fraction of HEK293T cells expressing GFP or the BC-chromobodies. Shown are the antibody signals for GFP (chromobody) and GAPDH (control). **(B)** Densitometric evaluation of immunoblot analysis. Immunoblot signals of GFP and BC-chromobodies were normalized to GAPDH. GFP expression was set to one and ratios of BC-chromobodies in comparison to GFP are shown. Shown are mean signals of three independent replicates  $\pm$  stds.

144

145

146

147

148

149

150

151

152

153

154

155 **suppl. Figure 7:**

156 BC-chromobodies are not cytotoxic. Resazurin assay of HeLa cells expressing BC1-, BC6- or  
157 BC9-chromobodies or EGFP control. Depicted viability values represent relative mean  
158 fluorescence intensities ( $\pm$  stds) determined for transfection triplicates after 24 h (**A**) and 48 h  
159 (**B**). Viability of untreated cells was set to 100 %.

160

161

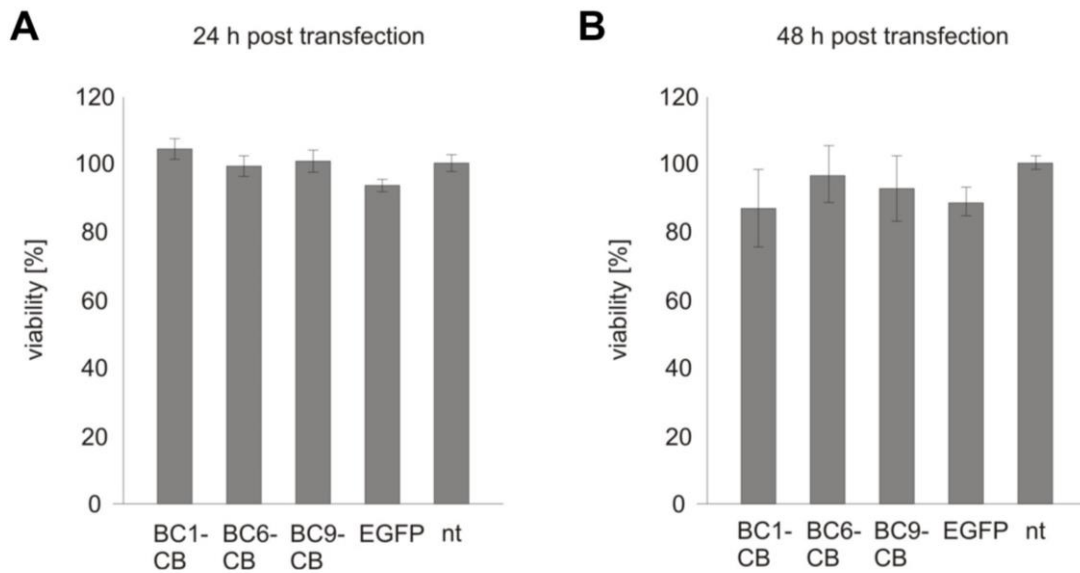

162  
163  
164  
165  
166  
167  
168  
169  
170  
171  
172  
173  
174  
175  
176  
177  
178  
179  
180  
181  
182  
183  
184  
185  
186

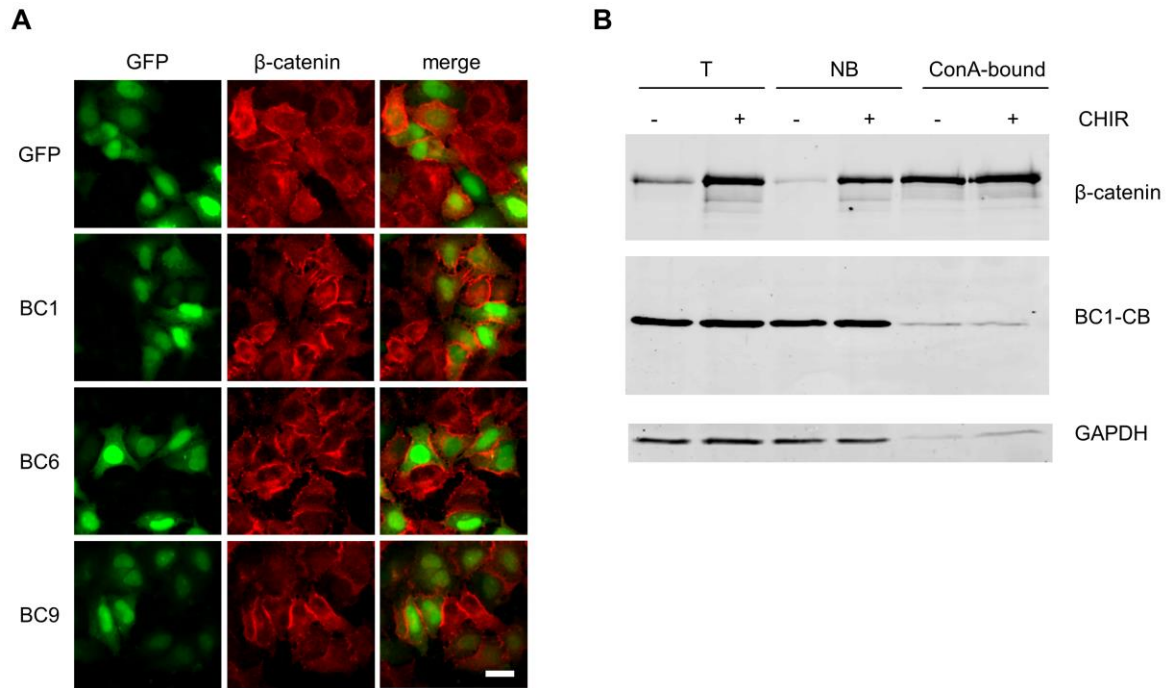

**suppl. Figure 8:**

BC-chromobodies do not recognize membrane-associated β-catenin. **(A)** HeLa cells transiently expressing indicated GFP-tagged BC-chromobodies (left panel) were fixed and immunostained with an anti-β-catenin antibody, H102 (middle panel). Scale bar: 25 μm. **(B)** HEK293T stably expressing the BC1-chromobody (BC1-CB) cells were either left untreated (-) or were incubated with 10 μM CHIR (+). E-cadherin-associated β-catenin was precipitated using ConA beads. From each sample 0.5 % of the total lysate (T), 0.5 % of the non-bound fraction (NB) and the 10% of the ConA-bound fraction (ConA-bound) were analyzed by SDS-PAGE and immunoblotting using an anti-β-catenin antibody (upper panel), an anti-tagGFP antibody (mid panel) or GAPDH (lower panel).



187  
188  
189  
190  
191  
192  
193  
194  
195  
196  
197  
198  
199  
200  
201  
202  
203  
204  
205  
206  
207  
208  
209

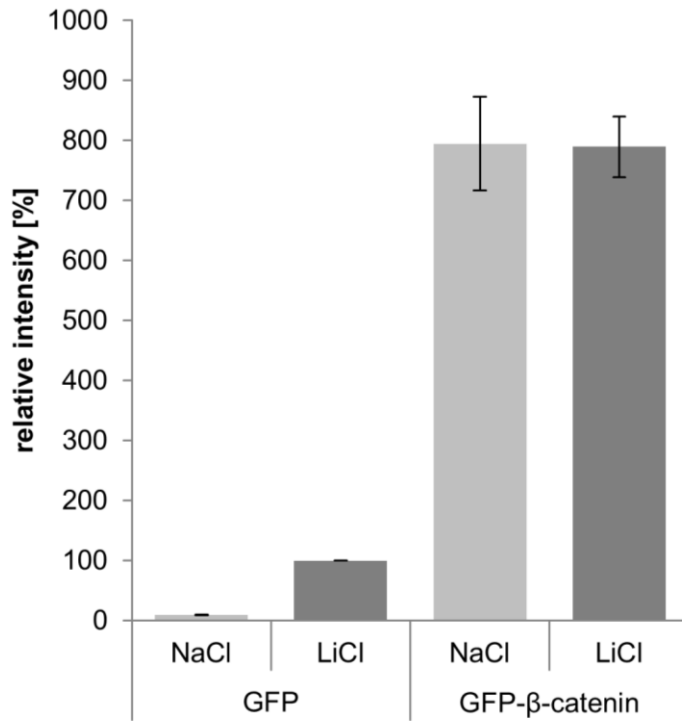

**suppl. Figure 9**

Expression of GFP-β-catenin induces transcriptional activity. HEK293T cells were either transfected with GFP or GFP-β-catenin in combination with reporter constructs containing TCF-Promoter-luciferase-reporter sites (TOP-flash) or a corresponding control construct with mutated TCF-binding sites (FOP-flash). Reporter activity of NaCl-treated cells is shown in light grey bars and LiCl-induced reporter activity is shown in dark grey bars. All values are normalized to mean luminescence values of LiCl-treated GFP control. Reporter induction after 24 h upon LiCl treatment is shown. Columns represent the results of three independent experiments ± stds.

210

211

212

213

214

215

216

217

218

219

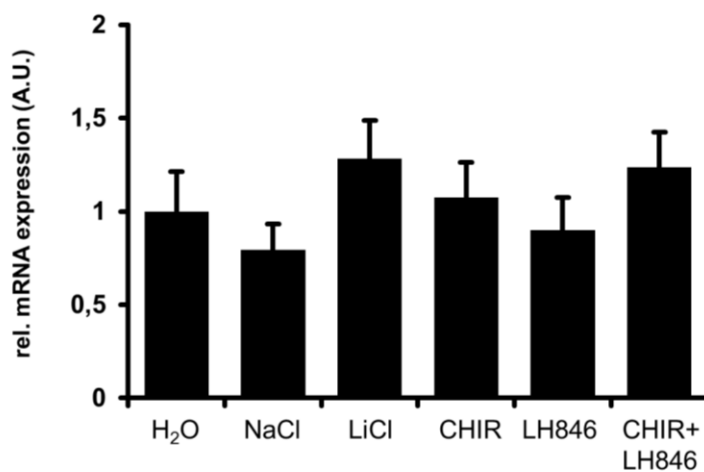

220 **suppl. Figure 10**

221 Compound treatment does not affect mRNA levels of BC1 chromobody. HeLa\_BC1-GFP cells  
222 were incubated for 24 h with H<sub>2</sub>O or NaCl as controls or compounds as indicated. The BC1-CB  
223 mRNA expression level was quantified by qRT-PCR analysis and normalized to GAPDH mRNA.  
224 Columns represent mean mRNA expression  $\pm$  stds of four independent replicates.
